# Supplementary material
Source: publisher figshare collection journal article supplement (https://asha.figshare.com/ndownloader/files/38952134)
Supplement: Supplementary file 1 [file 38952134]

**Supplemental Material S1.** Summary of musician's advantage for speech-in-speech.

| Study                                                     | Mean Age<br>M = musician<br>NM = nonmusician                               | Musician criteria                                                          | Paradigm(s)                                                                                                                                                                                                                                                                                      | Musician's Advantage?                                                                               |
|-----------------------------------------------------------|----------------------------------------------------------------------------|----------------------------------------------------------------------------|--------------------------------------------------------------------------------------------------------------------------------------------------------------------------------------------------------------------------------------------------------------------------------------------------|-----------------------------------------------------------------------------------------------------|
| Parbery-Clark, Skoe, Lam, & Kraus (2009)                  | M/NM: 23 ± 3 y<br>(range: 19-31)                                           | ≥ 10 y training<br>Started ≤ age 7<br>Practice ≥ 3xs/wk                    | QuickSIN<br>Repeat sentences presented in 4 talker babble (composed of 3 female voices, 1 male voice), varying the signal to noise ratio (SNR).                                                                                                                                                  | <b>Yes</b>                                                                                          |
| Parbery-Clark, Strait, Anderson, Hittner, & Kraus (2011)  | M: 55 ± 4.24 y<br>NM: 54 ± 6.02 y                                          | Started ≤ age 9<br>Practice ≥ 3xs/wk                                       | WIN & QuickSIN<br>Words and sentences in 4-talker babble                                                                                                                                                                                                                                         | <b>Yes</b><br>(both tasks)                                                                          |
| Zendel and Alain (2012)                                   | M: 45.3 y<br>(range: 19-91)<br>NM: 49.3 y<br>(range: 18-86)                | Started ≤ age 16<br>≥ 6 y lessons                                          | QuickSIN<br>Sentences in 4-talker babble                                                                                                                                                                                                                                                         | <b>Yes</b><br>(for older musicians)                                                                 |
| Strait, Parbery-Clark, O'Connell, & Kraus, (2013)         | M/NM: 3-5 y                                                                | Started training ≤ 12 months prior<br>Weekly lessons<br>Practice ≥ 4xs/wk  | ABR /da/<br>Hear a syllable in quiet and/or in babble and record brainstem response via electroencephalogram (EEG). Presented in 6-talker babble (2 male voices, 2 females voices)                                                                                                               | <b>Yes</b>                                                                                          |
| Ruggles, Freyman, & Oxenham (2014)                        | M: 21.8 y<br>NM: 20.7 y                                                    | ≥ 10 y training<br>Started ≤ age 10<br>Practice ≥ 5 hr/wk                  | QuickSIN<br>Sentences in 4-talker babble                                                                                                                                                                                                                                                         | <b>No difference</b>                                                                                |
| Boebinger et al. (2015)                                   | M/NM: 27.2 ± 6.9 y                                                         | ≥ 10 y training<br>Started ≤ age 7<br>Practice ≥ 3 xs/wk                   | BKB sentence targets<br>Spoken by a female speaker. Presented with a male masker                                                                                                                                                                                                                 | <b>No difference</b>                                                                                |
| Zendel et al. (2015)                                      | M: 23.4 ± 4.3 y<br>NM: 21.9 ± 2.6 y                                        | ≥ 10 y training<br>Started ≤ age 15<br>Practice ≥ 10 hr/wk                 | CVC words<br>Presented in 4-talker babble (15 dB SNR, 0 dB SNR)                                                                                                                                                                                                                                  | <b>Yes</b><br>(only at 0 dB SNR)                                                                    |
| Anaya et al. (2016)                                       | M/NM: 20.72 ± 2.72 y                                                       | Started ≤ age 9<br>Enrolled in college music program                       | PRESTO<br>Sentences presented in 6-talker babble                                                                                                                                                                                                                                                 | <b>No difference</b><br>(for composite speech-in-speech + speech-in-noise score)                    |
| Başkent & Gaudrain (2016)                                 | M: 22.75 ± 2.43 y<br>NM: 21.89 ± 1.97 y                                    | ≥ 10 y training<br>Started ≤ age 7                                         | Versfeld et al. (2000) sentences produced in 1-talker babble<br>Masker created by concatenating random 1 s sequences of non-target sentences. Mean f0 and apparent vocal tract length were manipulated.                                                                                          | <b>Yes</b>                                                                                          |
| Clayton et al. (2016)                                     | M: 22.5 ± 2.8 y<br>NM: 20.47 ± 1.4 y                                       | ≥ 10 y training<br>Practice ≥ 5 hr/wk<br>Enrolled in college music program | Target and 1-talker masker sentences (Swaminathan et al., 2015).<br>Targets presented at 0°, while maskers were either also presented at the same spatial location or at ±15°. Target and maskers were recorded by different female talkers. Target sentences were cued by the call-sign 'Jane.' | <b>Yes</b><br>(when masker was spatially separated; no advantage when target and masker were at 0°) |
| Mandikal Vasuki, Mridula Sharma, Demuth, & Arciuli (2016) | M: 28 y (median)<br>NM: 25 y (median)                                      | ≥ 10 y training<br>Started ≤ age 9                                         | LiSN-S test<br>Repeat sentences produced by the same or a different talker at (0°)                                                                                                                                                                                                               | <b>No difference</b>                                                                                |
| Slater & Kraus (2016)                                     | M: 25.4±5.7 y (Percussionists)<br>23.4±3.6 y (Vocalists)<br>NM: 23.2±3.8 y | Active musicians ≥ 7 y                                                     | WIN & QuickSIN<br>Words and sentences in 4-talker babble                                                                                                                                                                                                                                         | <b>Yes</b><br>(QuickSIN for drummers only. No difference for WIN)                                   |
| Deroche, Limb,                                            | M: 21.9 ± 2.6 y                                                            | 8 y training                                                               | Harvard/IEEE Sentence for target and                                                                                                                                                                                                                                                             | <b>No difference</b>                                                                                |

|                                                 |                                                                                 |                                                                                          |                                                                                                                                                                                                                                                                |                                                                       |
|-------------------------------------------------|---------------------------------------------------------------------------------|------------------------------------------------------------------------------------------|----------------------------------------------------------------------------------------------------------------------------------------------------------------------------------------------------------------------------------------------------------------|-----------------------------------------------------------------------|
| Chatterjee, & Gracco (2017)                     | NM: $25.1 \pm 5.9$ y                                                            | Started $\leq$ age 8                                                                     | 2-talker maskers spoken by the same male talker<br>The masker had a fixed f0 (150 Hz), while the target f0 varied ( $\Delta f_0 = 0, -2, -8$ ST). Target and maskers were also presented in the same and different ears.                                       | (no musician effect or interaction with f0 or ear)                    |
| Madsen, Whiteford, & Oxenham (2017)             | M: $21.13 \pm 2.47$ y<br>NM: $20.9 \pm 2.70$                                    | 10 y training<br>Started $\leq$ age 7<br>Practice $\geq 5$ hr/wk                         | Target (HINT) sentences with 1-talker interferer (IEEE sentences)<br>Target and masker recorded by different male talkers. The masker average f0 was lower than the target by 0, 1, 2, 4, 8 ST (1/2 trials with normal intonation and 1/2 of trials monotone). | <b>No difference</b><br>(for both natural and monotone f0 conditions) |
| Morse-Fortier, Parrish, Baran, & Freyman (2017) | M: 20.1 y<br>NM: 22.5 y                                                         | Daily practice<br>Enrolled in college music program                                      | Target sentences with 2-talker masker sentences (from Helfer, 1997)<br>Monitored for words from a list. Target voice was a female talker. Maskers were 2 other female talkers.                                                                                 | <b>Yes</b>                                                            |
| Yeend et al. (2017)                             | M/NM: 45 y (range: 30-57)                                                       | Professional musicians                                                                   | NAL-DCT<br>Monologues presented in multitalker background speech (-7dB SNR)<br><br>LiSN-S test<br>Repeat sentences produced by a different talker at ( $\pm 90^\circ$ )                                                                                        | <b>No difference</b><br>(both tasks)                                  |
| Zendel, West, Belleville, & Peretz (2017)       | Musical training group:<br>$67.5 \pm 4.2$ y<br><br>Control:<br>$69.3 \pm 5.7$ y | All were nonmusicians ( $\leq 3$ y musical training)                                     | Monosyllabic words in multitalker babble<br>Babble created by combining monologues spoken by 4 speakers at 15dB or 0 dB SNR                                                                                                                                    | <b>Yes</b><br>(Musical training group showed more improvement)        |
| Başkent et al. (2018)                           | M: 12.4 y (range = 11-13)<br>NM: 12.3 y (range: 11-14)                          | $\geq 5$ y training<br>Started $\leq$ age 7<br>Musical training in the last 3 y          | Meaningful target sentences with a masker (concatenated partial sentences).<br>Target spoken by a female talker. Masker either by the same female talker or a male talker (masker onset preceded target sentence).                                             | <b>No difference</b>                                                  |
| Couth et al. (2021)                             | M: 18-26 y<br>NM: 18-27 y                                                       | College/early-career musicians<br>(either completing or graduated $< 1$ y prior)         | CRM paradigm<br>Target cued by 'Baron'; two maskers. Target and masker talkers were randomly selected from 2 female and 2 female talkers                                                                                                                       | <b>No difference</b>                                                  |
| Kaplan et al. (2021)                            | M: 27.13 y (range: 19-45)<br>NM: 26.35 y (range 19-46)                          | $\geq 10$ y training<br>Started $\leq$ age 7<br>Practicing $\geq 3$ y prior to the study | Semantically neutral target sentences with 1-talker masker (meaningful sentences from Versfeld et al., 2000).<br>Target and masker were recorded by 2 female talkers. Target-to-masker ratio (TMR): -3dB, -5 dB, -7dB, -9dB                                    | <b>Yes</b>                                                            |
| Mussoi (2021)                                   | M: $69.5 \pm 4.5$ y<br>NM: $70.1 \pm 3.6$ y                                     | $\geq 5$ y training<br>Started $\leq$ age 10<br>Practice $\geq 3$ hr/wk                  | QuickSIN<br>Words in 4-talker babble                                                                                                                                                                                                                           | <b>No difference</b>                                                  |

**Supplemental Material S2.** Calculations of semitone separation based on Kishon-Rabin et al. (2001).

| Group        | Relative difference limen (relDLF); $\Delta f/f_1$ | Just noticeable difference (JND) relative to 100 Hz                                | Semitone difference from 100 Hz; <i>hqmisc</i> R package $f2st(f_2, \text{base} = 100)$ |
|--------------|----------------------------------------------------|------------------------------------------------------------------------------------|-----------------------------------------------------------------------------------------|
| Musicians    | $\Delta f/f_1 = 0.00907$                           | $\Delta f = 0.00907 : f_{100 \text{ Hz}}$<br>$\Delta f = 0.907$<br>$f_2 = 100.907$ | $\Delta \text{ST} = 0.156$                                                              |
| Nonmusicians | $\Delta f/f_1 = 0.01783$                           | $\Delta f = 0.01783 : f_{100 \text{ Hz}}$<br>$\Delta f = 1.783$<br>$f_2 = 101.783$ | $\Delta \text{ST} = 0.306$                                                              |

Kishon-Rabin et al. (2001) found that musicians had a smaller relative difference limen (relDLF:  $\Delta f/f_1 = 0.00907$ ) than nonmusicians (relDLF:  $\Delta f/f_1 = 0.01783$ ) in perceiving a difference in pure tones. We calculated what this difference limen would be relative to 100 Hz ( $\Delta f = \text{relDLF} : f_{100 \text{ Hz}}$ ). We then calculated the difference in semitones between the just-noticeable difference (JND) frequency (100.907 Hz for musicians, 101.783 for nonmusicians) and starting frequency (100 Hz) with the *hqmisc* R package:  $f2st(100 \text{ Hz} + \Delta f, \text{base} = 100 \text{ Hz})$ .



**Supplemental Material S4.** Confusion matrix for participants who did not reach 90% in single vowel identification (shown in percentages).

|          | observed |        |       |       |       |
|----------|----------|--------|-------|-------|-------|
| expected | bat      | bought | bet   | beat  | boot  |
| /æ/      | 69.7%    | 5.3%   | 22.7% | 2.3%  | 0%    |
| /ɑ/      | 66.7%    | 31.1%  | 1.5%  | 0.8%  | 0%    |
| /ɛ/      | 6.1%     | 6.1%   | 78%   | 6.8%  | 3%    |
| /i/      | 0%       | 1.5%   | 15.9% | 81.1% | 1.5%  |
| /u/      | 0.8%     | 22.7%  | 2.3%  | 0%    | 74.2% |

**Supplemental Material S5.** Confusion matrix for YA nonmusicians who did reach 90% in single vowel identification (shown in percentages).

|          | observed |        |       |       |       |
|----------|----------|--------|-------|-------|-------|
| expected | bat      | bought | bet   | beat  | boot  |
| /æ/      | 89.7%    | 0%     | 10.3% | 0%    | 0%    |
| /ɑ/      | 23.1%    | 76.9%  | 0%    | 0%    | 0%    |
| /ɛ/      | 0%       | 1.3%   | 94.9% | 2.6%  | 1.3%  |
| /i/      | 0%       | 0%     | 2.6%  | 97.4% | 0%    |
| /u/      | 0%       | 1.3%   | 5.1%  | 0%    | 93.6% |

**Supplemental Material S6.** Confusion matrix for YA musicians who did reach 90% in single vowel identification (shown in percentages).

|          | observed |        |      |      |      |
|----------|----------|--------|------|------|------|
| expected | bat      | bought | bet  | beat | boot |
| /æ/      | 97.9%    | 0%     | 2.1% | 0%   | 0%   |
| /ɑ/      | 11.5%    | 88.5%  | 0%   | 0%   | 0%   |
| /ɛ/      | 0%       | 0%     | 100% | 0%   | 0%   |
| /i/      | 0%       | 0%     | 0%   | 100% | 0%   |
| /u/      | 0%       | 0%     | 0%   | 0%   | 100% |

**Supplemental Material S7.** Confusion matrix for OA nonmusicians who did reach 90% in single vowel identification (shown in percentages).

|          | observed |        |       |       |      |
|----------|----------|--------|-------|-------|------|
| expected | bat      | bought | bet   | beat  | boot |
| /æ/      | 94%      | 0%     | 6%    | 0%    | 0%   |
| /ɑ/      | 10.7%    | 88.1%  | 1.2%  | 0%    | 0%   |
| /ɛ/      | 1.2%     | 4.8%   | 91.7% | 2.4%  | 0%   |
| /i/      | 1.2%     | 0%     | 6%    | 92.9% | 0%   |
| /u/      | 0%       | 3.6%   | 1.2%  | 1.2%  | 94%  |

**Supplemental Material S8.** Confusion matrix for OA musicians who did reach 90% in single vowel identification (shown in percentages).

|          | observed |        |       |       |       |
|----------|----------|--------|-------|-------|-------|
| expected | bat      | bought | bet   | beat  | boot  |
| /æ/      | 96.4%    | 0%     | 2.4%  | 1.2%  | 0%    |
| /ɑ/      | 16.7%    | 83.3%  | 0%    | 0%    | 0%    |
| /ɛ/      | 0%       | 0%     | 97.6% | 0%    | 2.4%  |
| /i/      | 1.2%     | 0%     | 0%    | 98.8% | 0%    |
| /u/      | 0%       | 0%     | 4.8%  | 0%    | 95.2% |
